# Supplementary material
Source: HighWire-hosted journal article supplement (https://rmdopen.bmj.com/content/9/1/e002960)

| Supplementary Table 1        |                                        |                                         |
|------------------------------|----------------------------------------|-----------------------------------------|
| Disease                      | Included in RDCI                       | ICD-10 code(s)                          |
| Crohn's disease              |                                        | K50,51                                  |
| Axial spondyloarthritis      |                                        | M45                                     |
| Iridozyclitis                |                                        | H20                                     |
| RA                           |                                        | M05,06                                  |
| Lung disease                 | *                                      | J40-47, J60-67, J68.4, J70.1, J70.3     |
| Myocardial infarction        | *                                      | I21, I22, I25.2                         |
| Other cardiovascular disease | *                                      | I11.0, I13.0, I13.2, I25, I42, I43, I50 |
| Stroke                       | *                                      | I63,64                                  |
| Hypertension                 | *                                      | I10-15                                  |
| Depression                   | *                                      | F31-34, F41.2                           |
| Dementia                     |                                        | F00-03                                  |
| Hypothyroidism               |                                        | E00-03, E89.0                           |
| Diabetes mellitus            | *                                      | E10-14                                  |
| Ulcer or stomach problem     | *                                      | K25-31                                  |
| Cancer                       | *                                      | C00-97                                  |
| Obesity                      |                                        | E66                                     |
| Dyslipidemia                 |                                        | E78                                     |
| Renal failure                |                                        | N18                                     |
| Liver disease                |                                        | K70-77                                  |
| Gout                         |                                        | M10                                     |
| Osteoporosis                 |                                        | M80-82                                  |
| Osteoarthritis               |                                        | M15-17                                  |
| Fracture                     | *                                      | M80, M84, S72, S12, T08, T12            |
| Drugs                        | Included as DMARD for cohort inclusion | ATC-Code(s)                             |
| Glucocorticoids              |                                        | H02AB                                   |
| intraarticular               |                                        | H02AB51,54,56,58                        |
| Methotrexate                 | *                                      | L01BA01, L04AX03, M01CX01               |
| Sulfasalazine                | *                                      | A07EC01, M01CX02                        |
| Leflunomide                  | *                                      | L04AA13                                 |
| Ciclosporin                  | *                                      | L04AD01                                 |
| TNF-inhibitors               | *                                      | L04AB                                   |
| Etanercept                   | *                                      | L04AB01                                 |
| Infliximab                   | *                                      | L04AB02                                 |
| Adalimumab                   | *                                      | L04AB04                                 |
| Golimumab                    | *                                      | L04AB06                                 |
| Certolizumab pegol           | *                                      | L04AB05                                 |
| Abatacept                    | *                                      | L04AA24                                 |
| Ustekinumab                  | *                                      | L04AC05                                 |
| Secukinumab                  | *                                      | L04AC10                                 |
| Ixekizumab                   | *                                      | L04AC13                                 |
| Guselkumab                   | *                                      | L04AC16                                 |
| Apremilast                   | *                                      | L04AA32                                 |
| Tofacitinib                  | *                                      | L04AA29                                 |
| Upadacitinib                 | *                                      | L04AA44                                 |
| Metamizol                    |                                        | N02BB02                                 |
| Etoricoxib                   |                                        | M01AH05                                 |
| Tilidin/Naloxon              |                                        | N02AX51                                 |
| NSAIDs                       |                                        | M01A                                    |
| Diclofenac                   |                                        | M01AB05                                 |

| Supplementary Table 2 Characteristics by age groups                                                                                           |              |              |              |              |              |              |              |
|-----------------------------------------------------------------------------------------------------------------------------------------------|--------------|--------------|--------------|--------------|--------------|--------------|--------------|
|                                                                                                                                               | 18-30        | 31-40        | 41-50        | 51-60        | 61-70        | 71-80        | >80 years    |
| <b>Persons with PsA</b>                                                                                                                       |              |              |              |              |              |              |              |
| N                                                                                                                                             | 242          | 779          | 1425         | 3518         | 3601         | 1860         | 559          |
| <b>Specialist Care</b>                                                                                                                        |              |              |              |              |              |              |              |
| No Specialist (%)                                                                                                                             | 16           | 15           | 17           | 16           | 17           | 15           | 17           |
| Rheumatology only (%)                                                                                                                         | 37           | 43           | 39           | 41           | 41           | 37           | 34           |
| Dermatology (%)                                                                                                                               | 19           | 16           | 17           | 15           | 16           | 17           | 17           |
| Both (%)                                                                                                                                      | 28           | 27           | 27           | 28           | 27           | 31           | 33           |
| Elixhauser Score, mean (SD)                                                                                                                   | 1.4<br>(1.3) | 1.8<br>(1.5) | 2.5<br>(1.9) | 3.2<br>(2.3) | 4.1<br>(2.6) | 5.0<br>(2.8) | 5.7<br>(2.8) |
| RDCI, mean (SD)                                                                                                                               | 0.4<br>(0.8) | 0.7<br>(1.0) | 1.2<br>(1.3) | 1.6<br>(1.5) | 2.1<br>(1.6) | 2.6<br>(1.6) | 3.0<br>(1.7) |
| RA Diagnosis, %                                                                                                                               | 23           | 22           | 29           | 34           | 39           | 45           | 50           |
| ≥1 M05 Diagnosis, %                                                                                                                           | 4.5          | 4.0          | 5.4          | 7.2          | 8.1          | 11           | 12           |
| Polypharmacy* (%)                                                                                                                             | 15           | 17           | 31           | 43           | 57           | 69           | 78           |
| <b>Controls</b>                                                                                                                               |              |              |              |              |              |              |              |
| N                                                                                                                                             | 2420         | 7790         | 14250        | 35180        | 36010        | 18600        | 5590         |
| Elixhauser Score, mean (SD)                                                                                                                   | 0.6<br>(0.9) | 0.8<br>(1.1) | 1.2<br>(1.5) | 1.7<br>(1.8) | 2.5<br>(2.2) | 3.4<br>(2.5) | 4.1<br>(2.6) |
| Polypharmacy* (%)                                                                                                                             | 0.2          | 1.2          | 4.2          | 9.8          | 20           | 35           | 46           |
| RDCI Rheumatic Disease Comorbidity Index, RA Rheumatoid arthritis, M05 ICD-10 code for seropositive RA;<br>* ≥ 5 medications at the same time |              |              |              |              |              |              |              |

| Supplementary Table 3<br>Defined daily doses (DDDs) for persons with related drug prescriptions |                |           |
|-------------------------------------------------------------------------------------------------|----------------|-----------|
|                                                                                                 | Total<br>(PsA) | DDDs      |
| N                                                                                               | 11984          |           |
|                                                                                                 | %              | Mean (SD) |
| A: Alimentary tract and metabolism                                                              | 57             | 468 (481) |
| Antidiabetics                                                                                   | 15             | 519 (424) |
| Antiulceratives/reflux                                                                          | 42             | 365 (288) |
| Calcium and vitamine D                                                                          | 1.4            | 171 (125) |
| B: Blood and blood forming organs                                                               | 48             | 142 (189) |
| Folic acid                                                                                      | 35             | 43 (31)   |
| C: Cardiovascular system                                                                        | 62             | 881 (730) |
| Antiarrhythmic                                                                                  | 0.9            | 209 (128) |
| Antihypertensives                                                                               | 3.5            | 331 (263) |
| Diuretics                                                                                       | 17             | 242 (253) |
| Beta blockers                                                                                   | 24             | 186 (130) |
| Calcium channel blockers                                                                        | 19             | 387 (232) |
| ACE inhibitors                                                                                  | 47             | 608 (416) |
| Lipid reducer                                                                                   | 22             | 359 (279) |
| D: Dermatologicals                                                                              | 44             | 132 (187) |
| Antipsoriatics, topical application                                                             | 16             | 154 (180) |
| Antipsoriatics, systemic application                                                            | 0.5            | 108 (99)  |
| Topical steroids                                                                                | 27             | 89 (121)  |
| G: Genito urinary system and sex hormones                                                       | 15             | 310 (262) |
| Estrogens                                                                                       | -              | 307 (270) |
| H: systemic hormonal preparations                                                               | 51             | 205 (160) |
| Glucocorticoids (all)                                                                           | 35             | 134 (124) |
| Glucocorticoids intraarticular                                                                  | 1.6            | 84 (75)   |
| Thyroid gland                                                                                   | 25             | 227 (123) |
| J: Antiinfective for systemic use                                                               | 32             | 20 (36)   |
| L: Antineoplastic and immunomodulating agents                                                   | 65             | 298 (145) |
| Immunosuppressants                                                                              | 64             | 296 (141) |
| csDMARDs (all)                                                                                  | 62             | 234 (122) |
| Methotrexate                                                                                    | 55             | 227 (116) |
| Sulfasalazine                                                                                   | 0.3            | 172 (118) |
| Leflunomide                                                                                     | 9.3            | 207 (117) |
| Ciclosporin                                                                                     | 0.4            | 121 (71)  |
| bDMARDs (all)                                                                                   | 49             | 296 (142) |
| TNF-inhibitors                                                                                  | 30             | 268 (138) |
| Etanercept                                                                                      | 8.9            | 240 (112) |
| Infliximab                                                                                      | 0.9            | 616 (297) |
| Adalimumab                                                                                      | 16             | 243 (108) |
| Golimumab                                                                                       | 2.2            | 305 (159) |
| Certolizumab pegol                                                                              | 2.9            | 246 (108) |
| Ig fusion protein Abatacept                                                                     | 0.6            | 140 (78)  |
| IL12/23i Ustekinumab                                                                            | 3.9            | 415 (214) |
| IL17i Secukinumab                                                                               | 10             | 255 (111) |
| Ixekizumab                                                                                      | 5.2            | 252 (111) |
| IL23i Guselkumab                                                                                | 3.3            | 255 (116) |
| PDE4i Apremilast                                                                                | 4.1            | 239 (118) |
| JAKi Tofacitinib                                                                                | 1.9            | 237 (124) |
| Upadacitinib                                                                                    | 3.5            | 186 (107) |
| M: Musculoskeletal system                                                                       | 81             | 280 (226) |
| NSAIDs                                                                                          | 50             | 131 (142) |
| Diclofenac                                                                                      | 9.6            | 91 (100)  |
| Etoricoxib                                                                                      | 12             | 150 (151) |
| Gout medication                                                                                 | 7.8            | 154 (103) |
| Bone mineralisation                                                                             | 5.3            | 284 (120) |

|                                                     |     |           |
|-----------------------------------------------------|-----|-----------|
| N: Nervous system                                   | 51  | 240 (343) |
| Analgesics                                          | 39  | 94 (163)  |
| Metamizol                                           | 29  | 28 (34)   |
| Opioids                                             | 18  | 147 (198) |
| Tilidin/Naloxon                                     | 8.3 | 120 (173) |
| Psycholeptics                                       | 8.1 | 100 (194) |
| Antidepressants                                     | 20  | 281 (271) |
| Antidementives                                      | 0.3 | 279 (193) |
| P: Antiparasitic products, insecticides, repellents | 2.2 | 37 (54)   |
| R: Respiratory system                               | 21  | 209 (268) |
| S: Sensory organs                                   | 16  | 136 (180) |
| Ophtalmologicals                                    | 14  | 150 (185) |
| V: Various                                          | 5.2 | 164 (161) |

Supplementary Figure 1 Comorbidity (Controls)

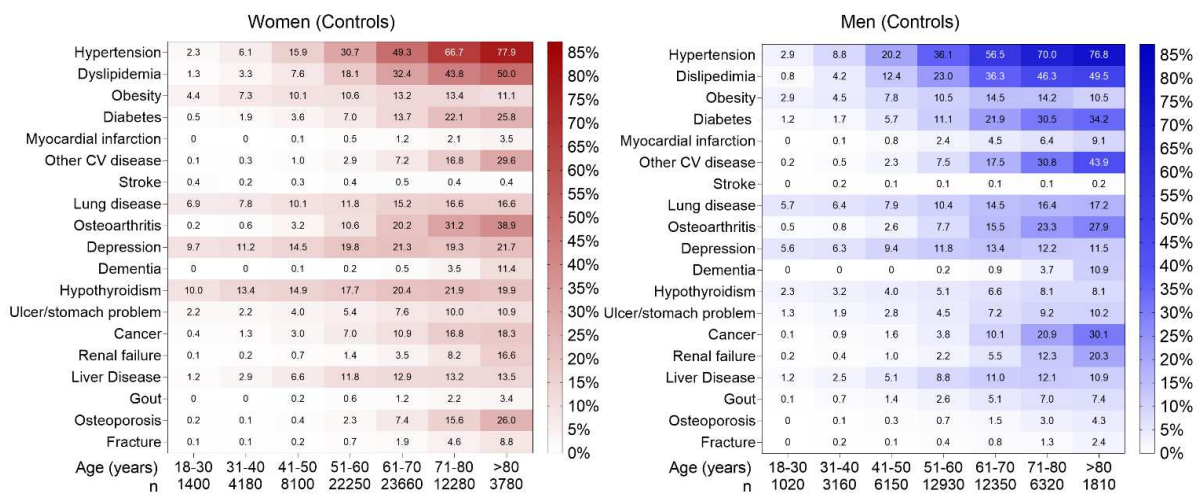

Supplementary Figure 2 Medication (Controls)

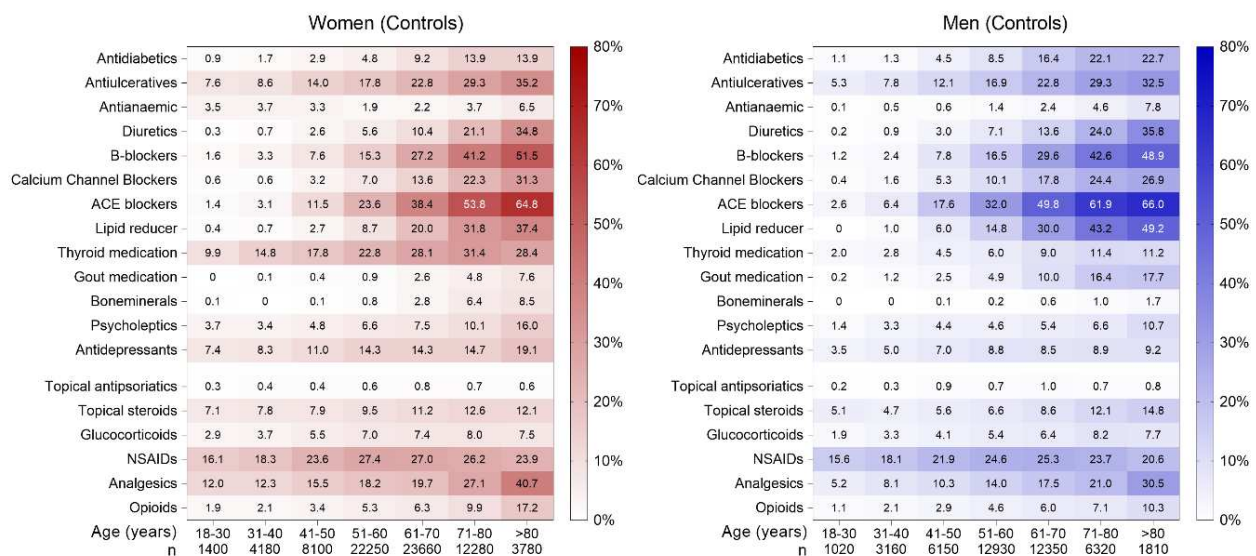

Supplementary Figure 3 Number of medications by age groups and Elixhauser Score (Controls)

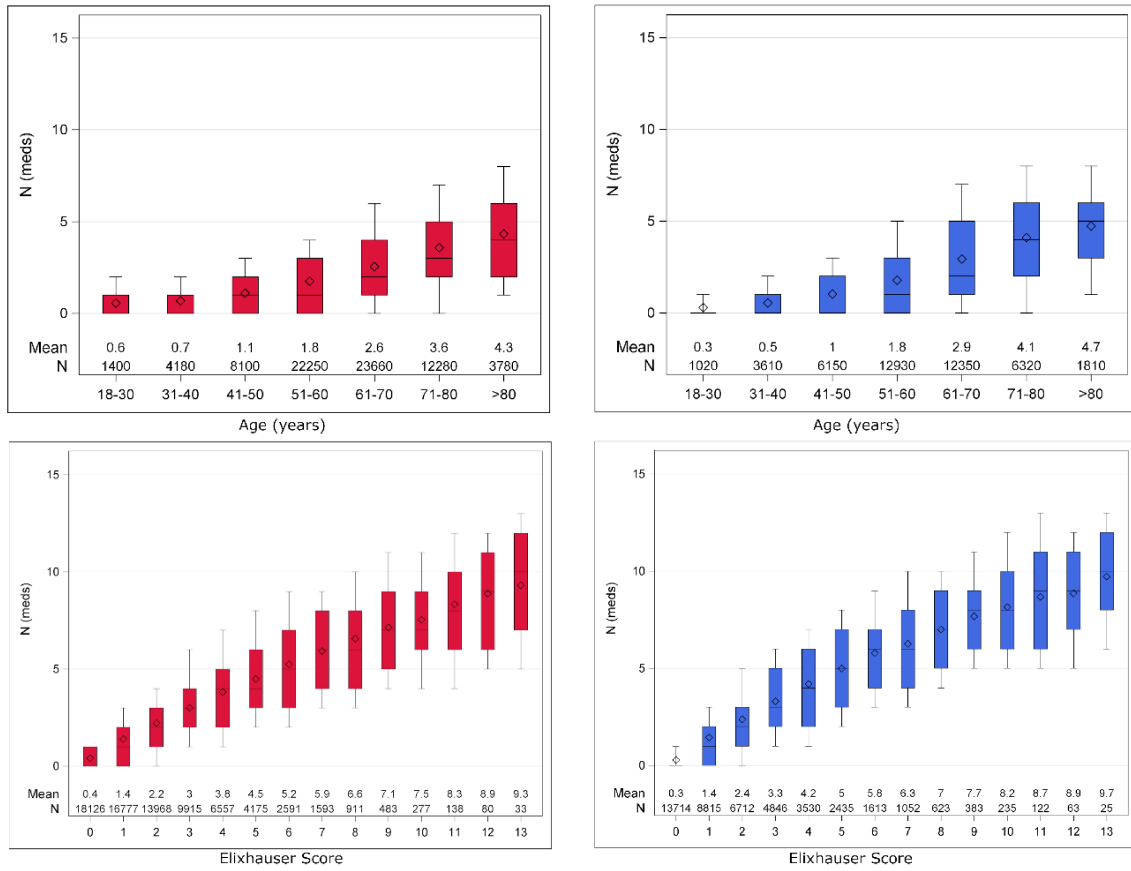

Supplement: inline-supplementary-material-1 [file inline-supplementary-material-1.pdf]
